# Supplementary material for: Efficient and recyclable removal of imidazolium ionic liquids from water using resorcinol–formaldehyde polymer resin
Source: Royal Society of Chemistry journal article supplement (doi:10.1039/c6ra09067b), 2016-01-01
Supplement: c6ra09067b1.pdf [file c6ra09067b1.pdf]

**Electronic Supporting Information**  
*for*  
Efficient and Recyclable Removal of Imidazolium  
Ionic Liquids from Water using Resorcinol–  
Formaldehyde Polymer Resin

*Kun-Yi Andrew Lin\* and Chang-Hsuan Wu*

Department of Environmental Engineering, National Chung Hsing University,  
250 Kuo-Kuang Road, Taichung, Taiwan

\*Corresponding Author. Tel: +886-4-22854709, E-mail address: [linky@nchu.edu.tw](mailto:linky@nchu.edu.tw)

(Kun-Yi Andrew Lin)

## **S1. Preparation of RF resin**

### **S1.1 Materials**

All chemicals involved in this study were purchased from commercial suppliers and used directly without purification. Resorcinol, sodium dodecyl sulfate (SDS), and Pluronic P123 were obtained from Sigma-Aldrich (USA). Cetyltrimethylammonium bromide (CTAB) and formaldehyde were purchased from Acros Organics (USA). Sodium carbonate and sodium chloride were purchased from Showa Chemical (Japan). All ionic liquids (BMIMCl, EMIMCl, HMIMCl and BMIMBF<sub>4</sub>) were obtained from Alfa Aesar (USA). Deionized (DI) water was prepared to exhibit less than 18 MOhm-cm.

### **S1.2 Synthesis and characterization of RF resin**

RF resin was prepared with modifications based on a reported protocol [S1] via the addition and condensation reactions as illustrated in Fig. 1 [S2]. Resorcinol (*e.g.*, 1 g) was first dissolved in 100 mL of DI water, to which 0.1 g of Na<sub>2</sub>CO<sub>3</sub> was added. The solution was then heated to 40 °C and stirred until the mixture became yellowish. Subsequently, formaldehyde solution (*e.g.*, 11 mL) was dropwise added to the solution. Gelation of the resulting mixture was implemented at 85 °C for 3 days. The resulting gel was then dried at 65 °C for 1 day under reduce pressure and ground into fine powder, which was washed with acetone and oven dried to yield the final product, RF resin.

The as-synthesized RF resin was first characterized for its morphology using scanning electronic microscopy (SEM) (JEOL JSM-6700, Japan). Powder X-ray diffraction patterns (PXRD) of RF resin was measured using an X-ray diffractometer (Bruker D8 Discover, USA) with copper as an anode material (40 mA, 35 kV).

Absorption infrared (IR) spectrum of RF resin was determined using a Fourier-Transform Infrared spectrometer (Perkin Elmer Spectrum Two, USA) with KBr pellets. The molecular weight of RF resin was analyzed using a gel permeation chromatography equipped with RI detector (Schambeck SFD RI 2000, Germany).

#### **References:**

- [S1] G. Zhang, C. Ni, L. Liu, G. Zhao, F. Fina, J.T.S. Irvine, Macro-mesoporous resorcinol-formaldehyde polymer resins as amorphous metal-free visible light photocatalysts, *Journal of Materials Chemistry A*, 3 (2015) 15413-15419.
- [S2] S.A. Al-Muhtaseb, J.A. Ritter, Preparation and Properties of Resorcinol-Formaldehyde Organic and Carbon Gels, *Advanced Materials*, 15 (2003) 101-114.

Table S1. Thermodynamic constants of BMIMCl adsorption using RF resin

| $E_a$<br>(kJ mol <sup>-1</sup> ) | A<br>(g mg <sup>-1</sup> m <sup>-1</sup> ) | Temp.<br>(K) | $\Delta G^\circ$<br>(kJ mol <sup>-1</sup> ) | $\Delta H^\circ$<br>(kJ mol <sup>-1</sup> ) | $\Delta S^\circ$<br>(kJ mol <sup>-1</sup> K <sup>-1</sup> ) |
|----------------------------------|--------------------------------------------|--------------|---------------------------------------------|---------------------------------------------|-------------------------------------------------------------|
| 10.8                             | $1.76 \times 10^5$                         | 303          | -23.34                                      | 13.2                                        | 0.12                                                        |
|                                  |                                            | 313          | -24.44                                      |                                             |                                                             |
|                                  |                                            | 323          | -25.75                                      |                                             |                                                             |

Table S2. Gibbs free energies of adsorption of EMIMCl, HMIMCl and BMIMBF<sub>4</sub> at 30 °C (303 K).

| ILs                 | $\Delta G^\circ$<br>(kJ mol <sup>-1</sup> ) |
|---------------------|---------------------------------------------|
| EMIMCl              | -21.10                                      |
| HMIMCl              | -27.75                                      |
| BMIMBF <sub>4</sub> | -28.25                                      |

Table S3. Comparison of RF's adsorption capacities for HMIMCl and BMIMBF<sub>4</sub> with other reported adsorbents.

| Material                                | Ionic Liquid        | Maximal adsorption Capacity | T (°C) | Reference          |
|-----------------------------------------|---------------------|-----------------------------|--------|--------------------|
| Macroporous Resorcinol-<br>Formaldehyde | EMIMCl              | 75                          | 30     | In this study      |
|                                         | HMIMCl              | 124                         | 30     |                    |
|                                         | BMIMBF <sub>4</sub> | 113                         | 30     |                    |
| Activated charcoal                      | HMIMCl              | 91                          | 30     | Palomar et al.[18] |
|                                         | BMIMBF <sub>4</sub> | 58                          | 30     |                    |
| Oxygenated carbonaceous<br>material     | BMIMBF <sub>4</sub> | 80                          | 25     | Qi et al.[17]      |

(a) Addition reaction

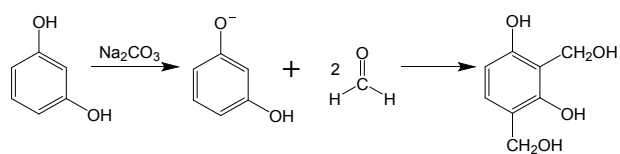

(b) Condensation reaction

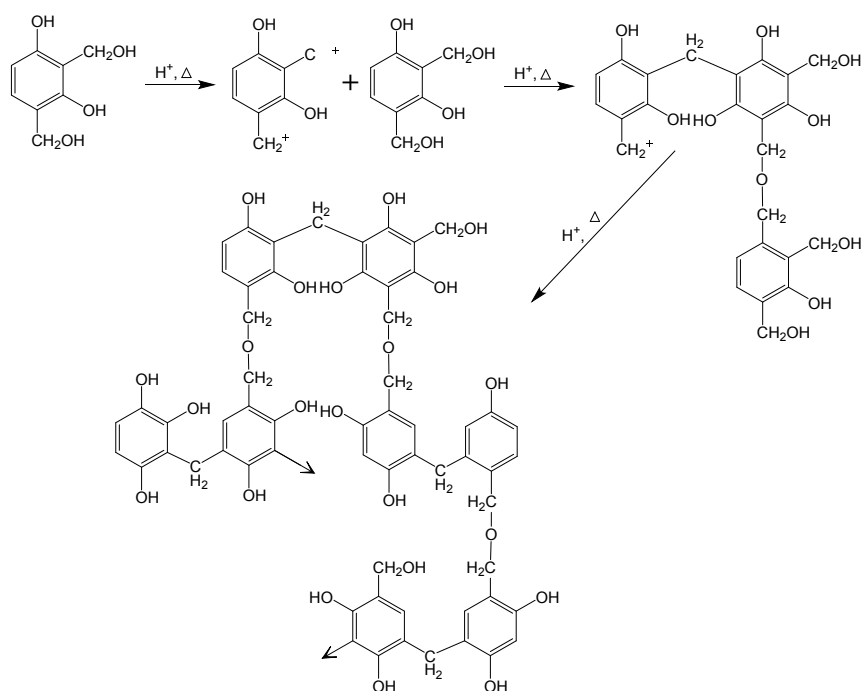

Fig. S1. Synthesis of RF resin: (a) Addition reaction and (b) Condensation reaction.

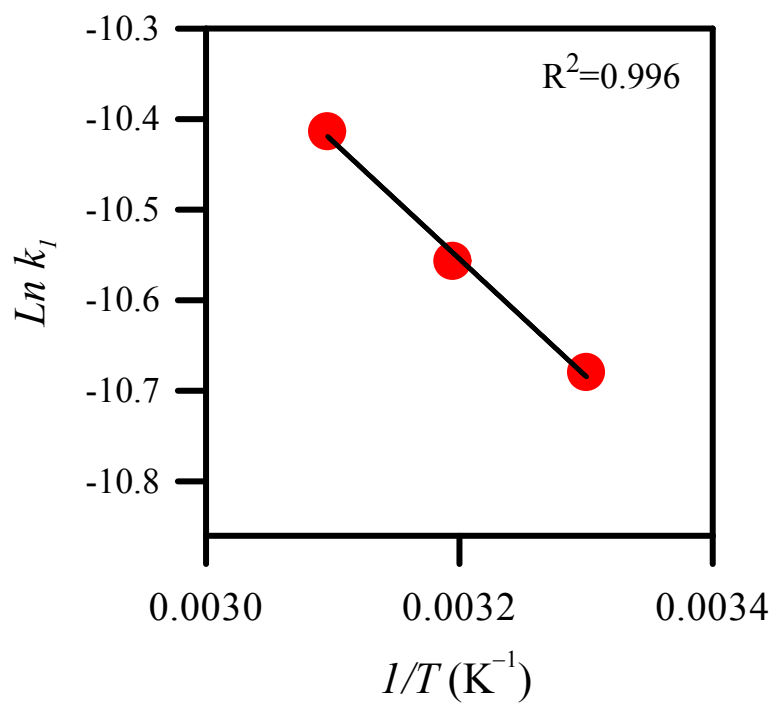

Fig. S2. A plot for determining the activation energy  $E_a$  and the temperature-independent factor  $k$

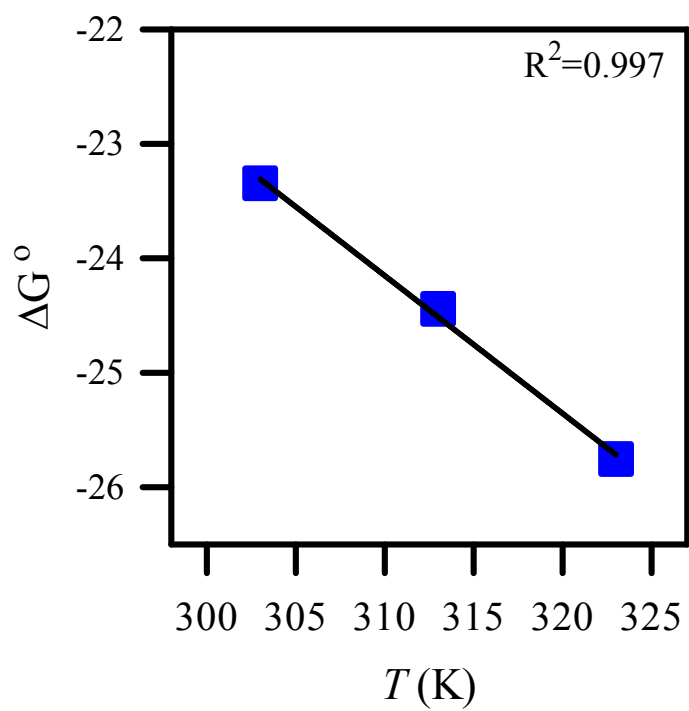

Fig. S3. A plot for determining the free energy ( $\Delta G^\circ$ ), the enthalpy ( $\Delta H^\circ$ ) and entropy ( $\Delta S^\circ$ ) of the adsorption.
